# Supplementary material for: Estimating the Associated Burden of Illness and Healthcare Utilization of Newly Diagnosed Patients Aged ≥65 with Mantle Cell Lymphoma (MCL) in Ontario, Canada
Source: MDPI journal article supplement (doi:10.3390/curroncol30060418), 2023-06-08
Supplement: s1 [file s1]

## SUPPLEMENTAL MATERIALS

**Supplementary Table S1. Regimens considered as first-line therapy for MCL**

| Abbreviated regimen name | Full regimen name                                                                                                                                          |
|--------------------------|------------------------------------------------------------------------------------------------------------------------------------------------------------|
| BR                       | Bendamustine, rituximab [Rituxan]                                                                                                                          |
| CHOP                     | Cyclophosphamide, doxorubicin, vincristine, prednisone                                                                                                     |
| R-CHOP                   | Rituximab, cyclophosphamide, doxorubicin [Hydroxydaunorubicin], vincristine [Oncovin], prednisone                                                          |
| R-DHAP*                  | Rituximab, dexamethasone, high-dose cytarabine (Ara-C), cisplatin                                                                                          |
| CVP                      | Cyclophosphamide, vincristine, prednisone                                                                                                                  |
| R-CVP                    | Rituximab, cyclophosphamide, vincristine, prednisone                                                                                                       |
| Hyper-CVAD               | Cyclophosphamide, vincristine, doxorubicin [Adriamycin], dexamethasone, methotrexate, cytarabine                                                           |
| R-HyperCVAD*             | Rituximab, cyclophosphamide, vincristine, doxorubicin, dexamethasone, methotrexate, cytarabine                                                             |
| CHLO                     | Chlorambucil                                                                                                                                               |
| CHLO-R                   | Chlorambucil, rituximab                                                                                                                                    |
| CYCL(PO)                 | Cyclophosphamide (oral)                                                                                                                                    |
| FC                       | Fludarabine, cyclophosphamide                                                                                                                              |
| FC-R                     | Fludarabine, cyclophosphamide, rituximab                                                                                                                   |
| FR                       | Fludarabine, rituximab                                                                                                                                     |
| FLUD-CYCLO-MITOXAN       | Fludarabine, cyclophosphamide, mitoxan                                                                                                                     |
| VR-CAP*                  | Bortezomib, rituximab, cyclophosphamide, doxorubicin, prednisone                                                                                           |
| LR*                      | Lenalidomide, rituximab                                                                                                                                    |
| RBAC500*                 | Rituximab, bendamustine, cytarabine                                                                                                                        |
| Nordic regimen*          | Dose-intensified induction with rituximab plus cyclophosphamide, vincristine, doxorubicin, prednisone alternating with rituximab plus high-dose cytarabine |

\*Regimens not identified in the MCL cohort but listed as recommended 1<sup>st</sup> LoT for MCL in guidelines

**Supplemental Table S2. Patient selection into MCL cohort, Ontario, Canada, 2013 – 2016**

| Cohort Selection Criteria                                                                                            |                                                               | Remaining Patients |               | Excluded |
|----------------------------------------------------------------------------------------------------------------------|---------------------------------------------------------------|--------------------|---------------|----------|
|                                                                                                                      |                                                               | No.                | %             | patients |
| MCL cohort inclusion criteria                                                                                        | Note                                                          |                    |               |          |
| Diagnosis prior to December 31 <sup>st</sup> , 2016 with MCL (Morphology code = 96733)                               |                                                               | 2,100              |               |          |
| Exclusion Criteria                                                                                                   |                                                               |                    |               |          |
| Invalid OHIP card number and age<65                                                                                  |                                                               | 1,270              |               |          |
| Invalid or incomplete records (missing age, sex, LHIN, income quintile, and rurality, or death before MCL diagnosis) |                                                               | 1,225              |               |          |
| Age ≥105 years at MCL diagnosis                                                                                      |                                                               | 1,225              |               |          |
| Non-Ontario resident                                                                                                 |                                                               | 1,225              |               |          |
| Undetermined MCL diagnosis (cancers other than MCL diagnoses on the same date)                                       |                                                               | 1,212              |               |          |
| No OHIP eligibility at diagnosis                                                                                     |                                                               | 1,206              |               |          |
| Death date recorded on the date of index diagnosis                                                                   |                                                               | 1,206              |               |          |
| Excluding those having MCL diagnosis date before January 1, 2013                                                     |                                                               | 325                |               |          |
| Excluding those having SCT any time before the end of the Analysis Period (including)                                |                                                               | 313                |               |          |
| <b>Pool of MCL Patients</b>                                                                                          |                                                               | <b>313</b>         | <b>100.0%</b> |          |
| MCL ≥ 65 in 1LoT subgroup inclusion criteria                                                                         |                                                               | 313                |               |          |
| Patients in the MCL ≥ 65 cohort who has record in ALR within 3 years from index date and up to 31Dec2019             |                                                               | 213                | 68.1%         | 100      |
| Excluding patients who participated in a clinical trial                                                              | (n=*1-5)                                                      |                    |               | *1-5     |
| Patients received confirmed 1st LoT                                                                                  | Excluded patients including those who participated in a trial | 183                | 58.5%         | 30       |
| Excluding patients who had refractory disease or treatment intolerance                                               |                                                               | 161                | 51.4%         | 22       |
| <b>MCL cohort</b>                                                                                                    |                                                               | <b>161</b>         |               |          |
| Matching to 4 general population controls                                                                            |                                                               | 159                | 50.8%         | 2        |
| <b>Matched MCL Patients</b>                                                                                          |                                                               | <b>159</b>         |               |          |

\*Values were suppressed as per ICES reporting standards to reduce the risk of patient re-identification

**Supplemental Table S3. First line therapy received by the MCL cohort^**

| Lines of Therapy                                                                  |                    | n (%)              |
|-----------------------------------------------------------------------------------|--------------------|--------------------|
| Regimen category                                                                  | <b>Overall</b>     | <b>161^ (100%)</b> |
|                                                                                   | BR                 | 125 (78.1%)        |
|                                                                                   | R-CHOP             | 21 (13.1%)         |
|                                                                                   | CHOP               | 0                  |
|                                                                                   | R-CVP              | *9-13              |
|                                                                                   | CVP                | 0                  |
|                                                                                   | Hyper-CVAD         | 0                  |
|                                                                                   | CHLO               | *1-5               |
|                                                                                   | CHLO-R             | 0                  |
|                                                                                   | CYCL(PO)           | 0                  |
|                                                                                   | FC                 | 0                  |
|                                                                                   | FC-R               | *1-5               |
|                                                                                   | FR                 | 0                  |
|                                                                                   | FLUD-CYCLO-MITOXAN | 0                  |
|                                                                                   |                    |                    |
| R-maintenance for 1 <sup>st</sup> LoT, n (%)                                      |                    | 126 (78.3%)        |
|                                                                                   |                    |                    |
| Time to next therapy (TTNT), days                                                 | n (%)              | 38 (23.6%)         |
| (from initiation of 1 <sup>st</sup> LoT to the initiation of 2 <sup>nd</sup> LoT) | Mean, SD           | 465.6, 220.6       |
|                                                                                   | Median (IQR)       | 462.5 (297-628)    |
|                                                                                   | Min - Max          | 29-988             |
|                                                                                   |                    |                    |

^MCL cohort prior to general population matching

\*Double suppression was conducted according to ICES reporting standards to reduce the risk of patient re-identification

**Supplemental Table S4. Demographic and clinical characteristics for matched MCL patients, by LoT categories**

| Demographic and Clinical Characteristics |               | BR (n=123)   | Other (n=36) |
|------------------------------------------|---------------|--------------|--------------|
| Sex                                      |               |              |              |
|                                          | Female        | 35 (28.5%)   | 16 (44.4%)   |
|                                          | Male          | 88 (71.5%)   | 20 (55.6%)   |
|                                          |               |              |              |
| Age                                      |               |              |              |
|                                          | Mean, SD      | 75.0 ± 6.0   | 76.1 ± 6.7   |
|                                          | Median (IQR)  | 74 (70 - 80) | 76 (72 - 81) |
|                                          | Min - Max     | 65 – 92      | 65 – 91      |
|                                          | 65 - 74 years | 63 (51.2%)   | 14 (38.9%)   |
|                                          | 75+ years     | 60 (48.8%)   | 22 (61.1%)   |
|                                          |               |              |              |
| Rural residence                          |               |              |              |
|                                          | Urban         | *100 - 104   | *31 - 35     |
|                                          | Rural         | *19 - 23     | *1 - 5       |
|                                          |               |              |              |
| Income quintile                          |               |              |              |
|                                          | Q1, lowest    | *19 - 23     | *1 – 5       |
|                                          | Q2            | *26 - 30     | *3 – 7       |
|                                          | Q3            | 23 (18.7%)   | 6 (16.7%)    |
|                                          | Q4            | 23 (18.7%)   | 10 (27.8%)   |
|                                          | Q5, highest   | 29 (23.6%)   | 11 (30.6%)   |
|                                          |               |              |              |
| New Ontario Resident at diagnosis        |               | *1 - 5       | *1 – 5       |
|                                          |               |              |              |
| Ontario Health Region                    |               |              |              |
|                                          | Central       | 40 (32.5%)   | 17 (47.2%)   |
|                                          | East          | *31 - 35     | *7 – 11      |

|                                                                  |                   |            |            |
|------------------------------------------------------------------|-------------------|------------|------------|
|                                                                  | West              | 36 (29.3%) | 7 (19.4%)  |
|                                                                  | North             | *12 - 16   | *1 - 5     |
|                                                                  |                   |            |            |
| Year of MCL cancer diagnosis                                     |                   |            |            |
|                                                                  | 2013              | *14 - 18   | *16 - 20   |
|                                                                  | 2014              | 33 (26.8%) | 8 (22.2%)  |
|                                                                  | 2015              | 35 (28.5%) | 7 (19.4%)  |
|                                                                  | 2016              | *37 - 41   | *1 - 5     |
|                                                                  |                   |            |            |
| Cancer stage at diagnosis                                        |                   |            |            |
|                                                                  | Stage I           | 0 (0%)     | *1 - 5     |
|                                                                  | Stage II          | *1 - 5     | 0 (0%)     |
|                                                                  | Stage III         | *16 - 20   | *1 - 5     |
|                                                                  | Stage IV          | *25 - 29   | *4 - 8     |
|                                                                  | Missing           | 74 (60.2%) | 26 (72.2%) |
|                                                                  |                   |            |            |
| Cancer history (assessed within 5-year lookback)^                |                   | *10 - 14   | *1 - 5     |
|                                                                  |                   |            |            |
| Charlson's co-morbidity index (assessed within 2-year lookback)  |                   |            |            |
|                                                                  | 0                 | *18 - 22   | *1 - 5     |
|                                                                  | 1                 | *1 - 5     | *1 - 5     |
|                                                                  | 2                 | *1 - 5     | *1 - 5     |
|                                                                  | 3+                | *1 - 5     | *1 - 5     |
|                                                                  | Missing           | 93 (75.6%) | 26 (72.2%) |
|                                                                  |                   |            |            |
| Comorbidities, any time before index date (ICES-derived cohorts) |                   |            |            |
|                                                                  | Diabetes mellitus | 28 (22.8%) | 10 (27.8%) |

|                                          |                                              |                       |                     |
|------------------------------------------|----------------------------------------------|-----------------------|---------------------|
|                                          | Congestive heart failure (CHF)               | *3 – 7                | *1 – 5              |
|                                          | Chronic obstructive pulmonary disease (COPD) | 29 (23.6%)            | 6 (16.7%)           |
|                                          | Rheumatoid arthritis (RA)                    | *1 - 5                | *1 – 5              |
|                                          | Crohn's disease / Ulcerative colitis         | *1 - 5                | 0 (0%)              |
|                                          |                                              |                       |                     |
| Time from index date to end of follow-up |                                              |                       |                     |
|                                          | Mean, SD                                     | 947.2 ± 296.9         | 806.4 ± 379.0       |
|                                          | Median (IQR)                                 | 1,095 (1,025 - 1,095) | 1,095 (503 - 1,095) |
|                                          | Min - Max                                    | 28 - 1,095            | 45 - 1,095          |
|                                          |                                              |                       |                     |

^Due to small cell sizes, the types of previous cancers could not be reported

\*Double suppression was conducted according to ICES reporting standards to reduce the risk of patient re-identification
